# Supplementary material
Source: Springer Nature journal article supplement (https://www.springermedizin.de/resource/supplementary/12894_2011_180_MOESM2_ESM.pdf/9513152)

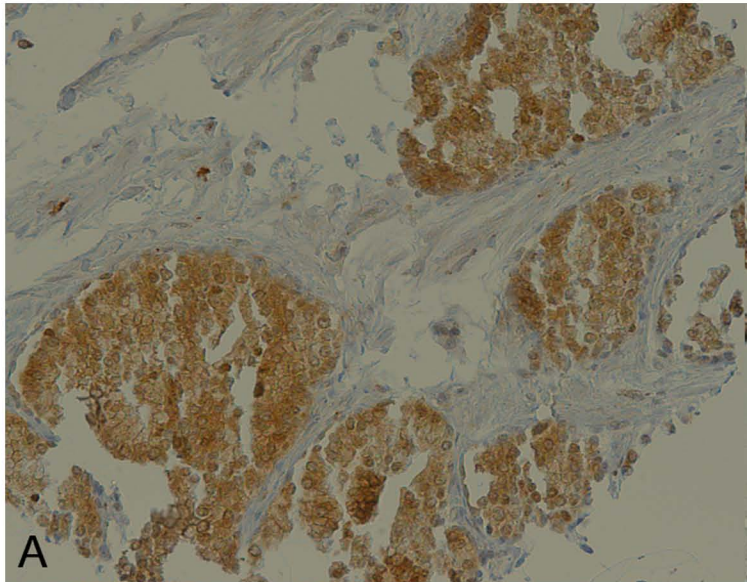

A

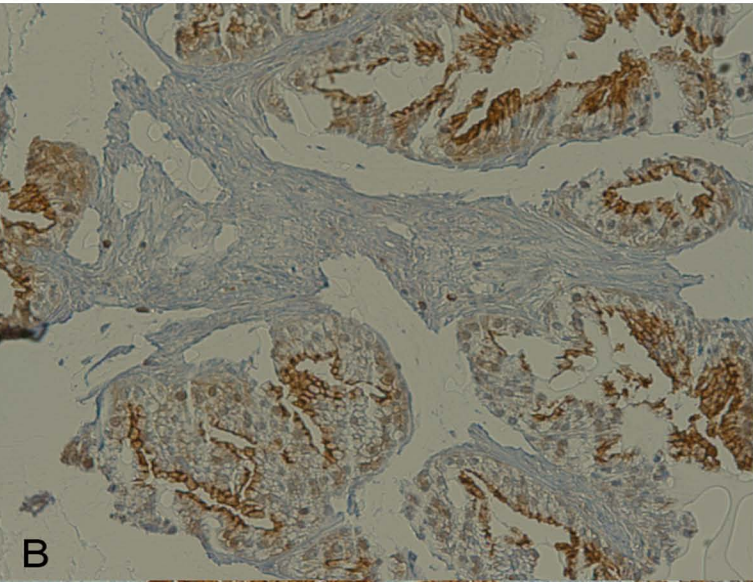

B

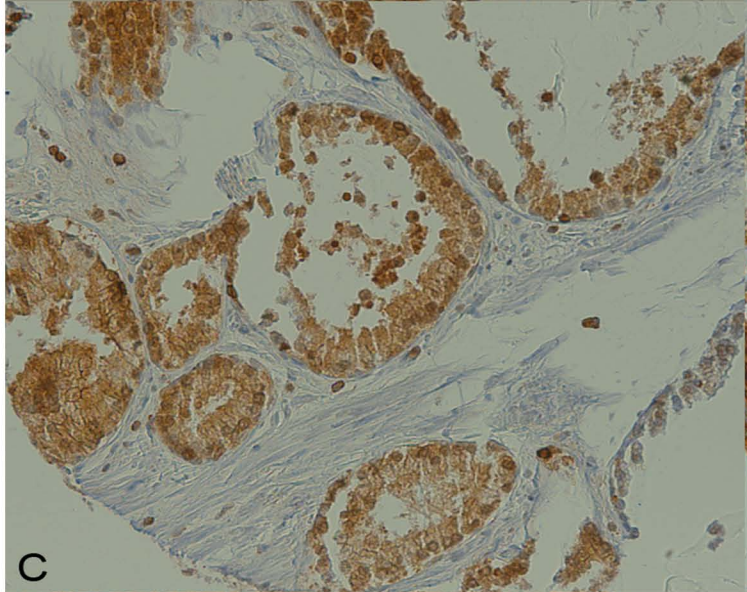

C

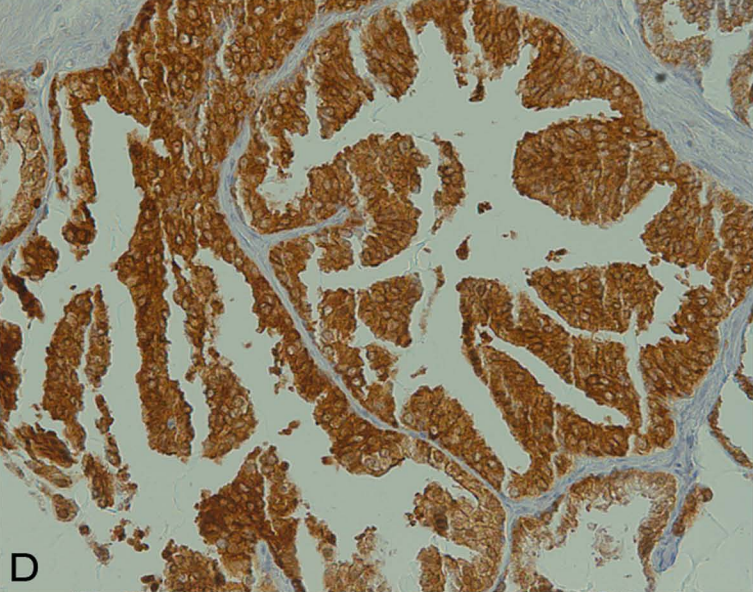

D

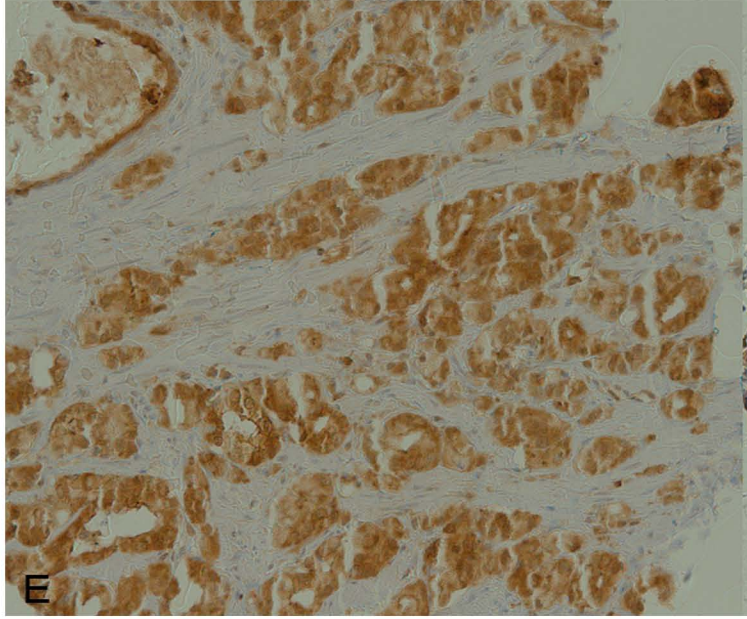

E

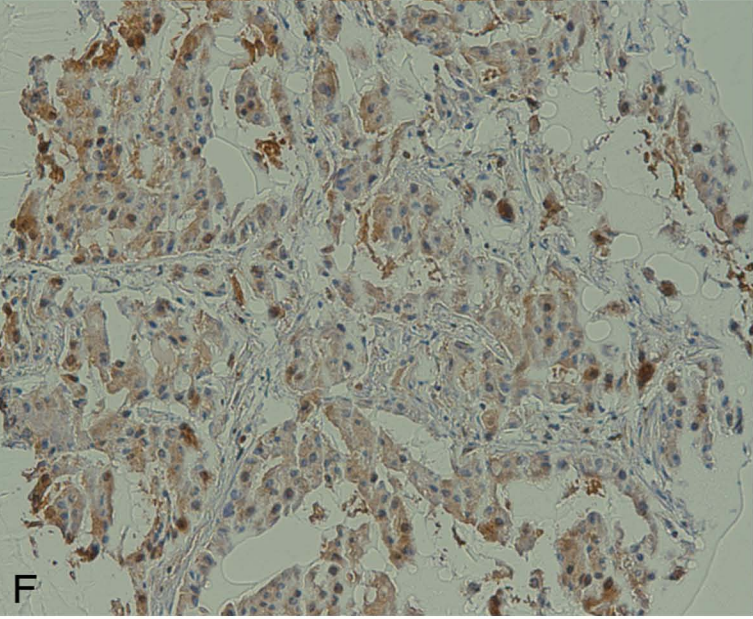

F

Supplement: MOESM2 [file 9513152]
